# Supplementary material for: Vascular microarray profiling in two models of hypertension identifies caveolin-1, Rgs2 and Rgs5 as antihypertensive targets
Source: PubMed Central journal article supplement (PMC2219888; doi:10.1186/1471-2164-8-404), 2007-11-07

**A**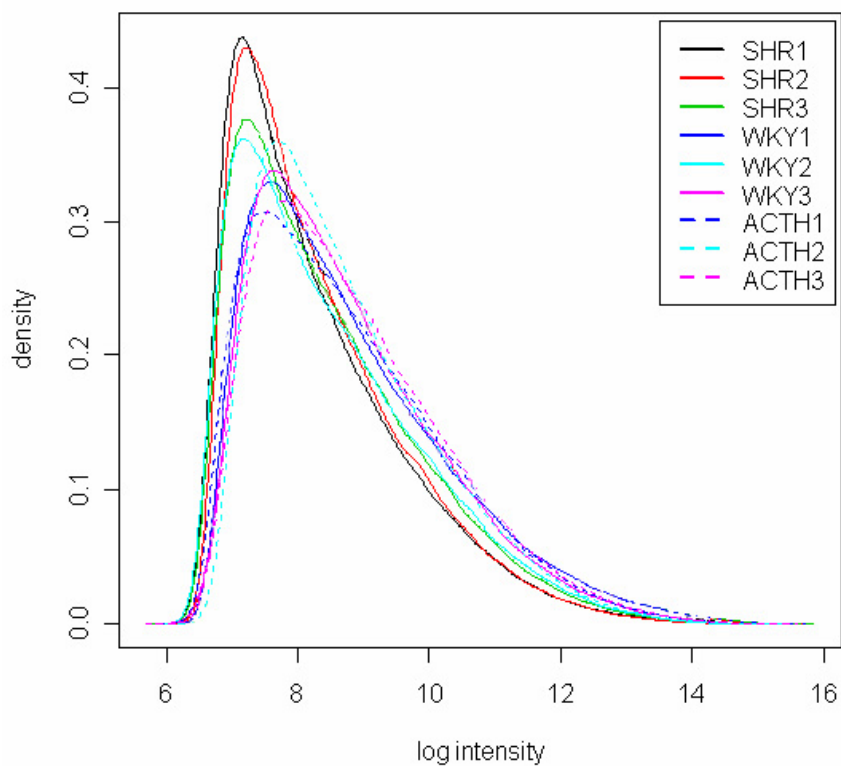**B**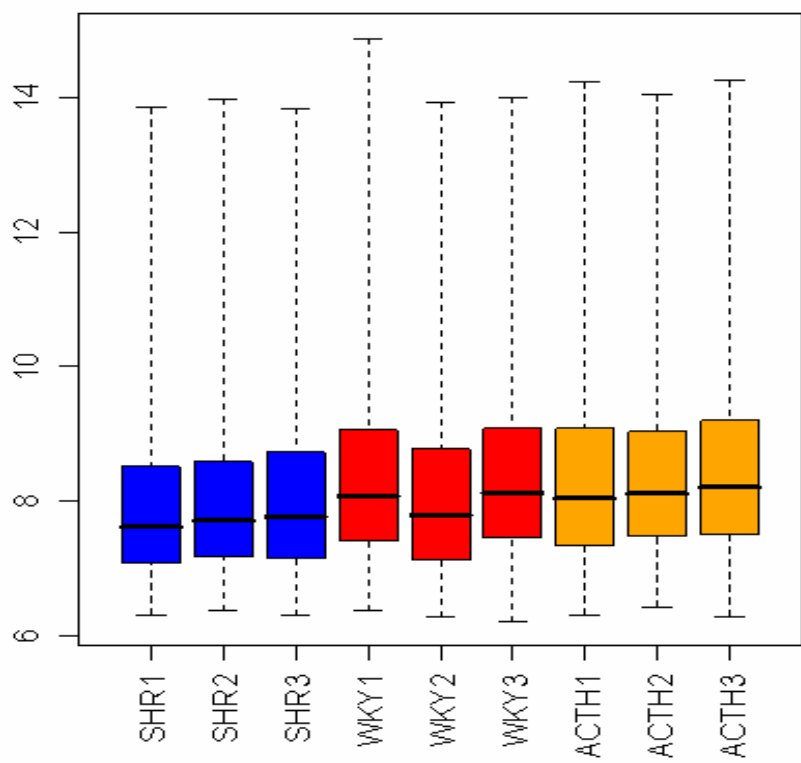

Supplement: 1471-2164-8-404-S15.pdf [file 1471-2164-8-404-S15.pdf]
